# Supplementary material
Source: Springer Nature journal article supplement (https://www.springermedizin.de/resource/supplementary/12875_2012_791_MOESM4_ESM.pdf/9435392)

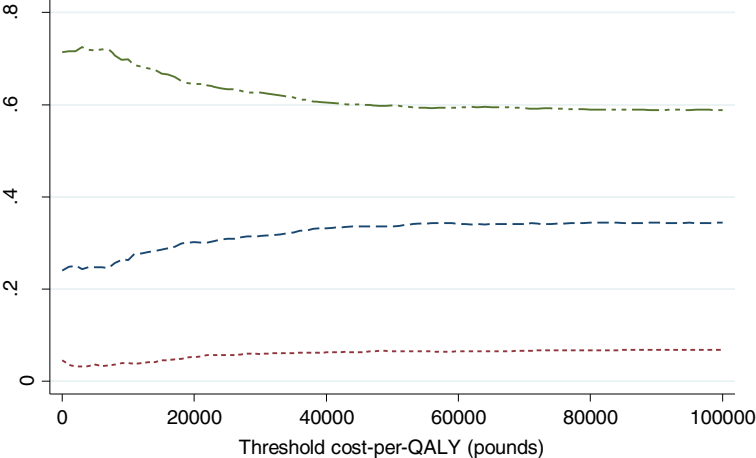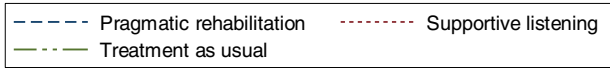

Supplement: MOESM4 [file 9435392]
